# Supplementary material for: Awakening and Counterregulatory Response to Hypoglycemia During Early and Late Sleep
Source: Oxford University Press journal article supplement (doi:10.2337/db07-0044), 2007-06-27
Supplement: db070044onlineapendix2.doc [file db070044onlineapendix2.doc]

**Appendix 2**

The following assays were used for determination of counterregulatory hormones: Plasma epinephrine and norepinephrine were measured by standard high-performance liquid chromatography with electrochemical detection (Chromosystems, Munich, Germany), inter-assay and intra-assay coefficient of variation (CV), and limit of sensitivity (LOS): CV epinephrine <5.6% and <2.9%, LOS 54.58 pmol/l; norepinephrine CV <6.1% and <2.6%, LOS 0.059 nmol/l. Plasma ACTH was measured by luminescence immunoassay (Lumitest, Brahms Diagnostica, Berlin, Germany), inter-assay CV <5.1%, intra-assay CV < 3.2%, LOS 0.22 pmol/l. Serum cortisol was measured by enzyme immunoassay (Enzymun-Test Cortisol, Roche Diagnostics, Mannheim, Germany), inter-assay CV <3.9%, intra-assay CV <2.0%, LOS 5.52 nmol/l. Serum growth hormone and plasma glucagon were measured by radioimmunoassay (growth hormone: Diagnostic Products Corporation, Los Angeles, USA; glucagon: Serono Diagnostics, Freiburg, Germany). Growth hormone: inter-assay CV <3.4%, intra-assay CV <1.6%, LOS 0.9µg/l, and glucagon: inter-assay CV <6.1%, intra-assay CV <4.9%, LOS 14.5 ng/l.
