# Supplementary material for: Awakening and Counterregulatory Response to Hypoglycemia During Early and Late Sleep
Source: Oxford University Press journal article supplement (doi:10.2337/db07-0044), 2007-06-27
Supplement: db070044onlineappendix1.doc [file db070044onlineappendix1.doc]

**Appendix 1**

**Polysomnographic sleep monitoring**

For polysomnografic sleep recording electrodes were attached to the scalp (electroencephalogram, EEG), around the eyes (horizontal and vertical electrooculogram, EOG) and on the chin (electromyogram, EMG). Recordings were scored offline according to standard criteria (Rechtschaffen A, Kales A: A manual for standardized terminology, techniques, and scoring system for sleep stages of human subjects. *Neurological Information Network* 1993). The following sleep parameters were determined for the whole night and, respectively, for the first and second half of the night (i.e., end of first half – beginning of second half at 3:00 h): Sleep period time (SPT, time from sleep onset until the final awakening defined as last occurrence of any sleep stage with the exception of `wake`), total sleep time (TST, time spent in sleep stage (S) 1, 2, 3, 4 and rapid eye movement (REM) sleep between sleep onset and final awakening), time (of SPT) spent awake after sleep onset (wake), the time spent in S1, S2, S3, S4, SWS (S3 + S4) and REM sleep (in min and %) and movements (in % of TST). The following table summarizes the respective sleep parameters during first and second part of night.

TABLE

Sleep parameters during first and second part of night.

|  | First half of night | | |
| --- | --- | --- | --- |
|  | Control | Early Hypo | Late Hypo |
| SPT (min) | 216 ± 2 | 218 ± 5 | 214 ± 4 |
| TST (min) | 214 ± 1 | 208 ± 2* | 211 ± 4 |
| Wake (%) | 1 ± 0 | 5 ± 2 | 2 ± 1 |
| S1 (%) | 15 ± 3 | 13 ± 2 | 15 ± 3 |
| S2 (%) | 47 ± 4 | 53 ± 4 | 50 ± 5 |
| SWS (%) | 26 ± 3 | 19 ± 4 | 23 ± 4 |
| REM (%) | 10 ± 2 | 8 ± 1 | 10 ± 2 |
| Movement (%) | 12 ± 2 | 18 ± 2* | 15 ± 1* |

| Second half of night | | |
| --- | --- | --- |
| Control | Early Hypo | Late Hypo |
| 184 ± 14 | 198 ± 10 | 207 ± 10 |
| 174 ± 16 | 188 ± 9 | 199 ± 9* |
| 4 ± 2 | 5 ± 2 | 5 ± 1 |
| 19 ± 4 | 17 ± 4 | 17 ± 2 |
| 45 ± 5 | 53 ± 4 | 54 ± 7 |
| 7 ± 2 | 4 ± 1 | 3 ± 1 |
| 26 ± 3 | 20 ± 3 | 21 ± 3 |
| 16 ± 3 | 21 ± 4 | 23 ± 3 |

Data are means ± SEM. P-values derive from Paired Student’s t-test. *: *P* < 0.05 in comparison with control night.

Hypo = hypoglycemia; SPT = sleep period time; TST = total time spent asleep; Wake = time (of SPT) spent awake after sleep onset; S1 = sleep stage 1; S2 = sleep stage 2; SWS = slow wave sleep; REM = rapid eye movement sleep
